# Supplementary material for: Plasmon resonances in semiconductor materials for detecting photocatalysis at the single-particle level
Source: Royal Society of Chemistry journal article supplement (doi:10.1039/c6nr04857a), 2016-01-01
Supplement: c6nr04857a1.pdf [file c6nr04857a1.pdf]

## Electronic supplementary information (ESI)

### Plasmon resonances in semiconductor materials for detecting photocatalysis at single-particle level

Jiahao Yan, Zhaoyong Lin, Churong Ma, Zhaoqiang Zheng, Pu Liu & Guowei Yang

\*

*State Key Laboratory of Optoelectronic Materials and Technologies, Nanotechnology  
Research Center, School of Materials Science & Engineering, Sun Yat-sen University,  
Guangzhou 510275, Guangdong, P. R. China*

\*Corresponding author: [stsygw@mail.sysu.edu.cn](mailto:stsygw@mail.sysu.edu.cn)

**Supplementary note 1.** X-Ray photoelectron spectroscopy (XPS; ESCALab250) was used to determine the oxidation state and the ratio between  $\text{Ti}^{3+}$  and  $\text{Ti}^{4+}$ . In O 1s spectra (Fig. S1a), the main peak located at 529.6 eV represents the lattice oxygen of  $\text{TiO}_2$ , while the shoulder peak at 531.5 eV corresponds to the oxygen vacancy- $\text{Ti}^{3+}$  surface state very clearly, also known as  $\text{Ti}_2\text{O}_3$ . Quantitative analysis of the XPS data indicates that the ratio between  $\text{O}^{2-}$  in  $\text{TiO}_2$  and defective oxides in  $\text{Ti}_2\text{O}_3$  is close to 2:3. And in Ti 2p spectra (Fig. S1b), small peaks at 458.6 eV and 464.6 eV are assigned to the  $2p_{3/2}$  and  $2p_{1/2}$  core levels of  $\text{Ti}^{4+}$ , while the red-shifted peaks at 458.0 eV and 463.5 eV mean obvious  $\text{Ti}^{3+}$  signals. And the ratio between  $\text{Ti}^{4+}$  and  $\text{Ti}^{3+}$  is 1:2. Therefore, the self-doping  $\text{TiO}_{2-x}$  can be regarded as  $\text{TiO}_{1.67}$ . And X-Ray diffraction (XRD; D/MAX-2200, Rigaku) spectra were collected from as-synthesized

TiO<sub>1.67</sub> and treated sample after annealing at 500°C (Fig. S1c). Although three strong diffraction peaks at 36.2°, 41.3° and 54.5° indexed to the characteristic peaks of rutile TiO<sub>2</sub> (JCPDS card File No.650192) can be observed in both TiO<sub>1.67</sub> and rutile TiO<sub>2</sub>, the diffraction peaks in rutile TiO<sub>2</sub> are much stronger and narrower. What is more, two weak diffraction peaks can only be observed in TiO<sub>1.67</sub> samples, which can be indexed to the (110) and (003) crystallographic planes of Ti<sub>3</sub>O<sub>5</sub> (JCPDS card File No.110217). It demonstrates the existence of defects in as-synthesized TiO<sub>1.67</sub>. Raman scattering spectrometry (Renishaw, with a laser source of 514 nm) was also used to demonstrate the existence of oxygen vacancies. In Fig. S1d, compared with annealed rutile TiO<sub>2</sub>, an obvious blue shift (~15 cm<sup>-1</sup>) and broadening of the E<sub>g</sub> band were clearly observed due to the photon-confinement effects induced by the lattice defects from non-stoichiometric TiO<sub>1.67</sub> NPs as a result of oxygen vacancies. More analysis can be found in our published work (*Nanoscale* 2016, **8**, 8826).

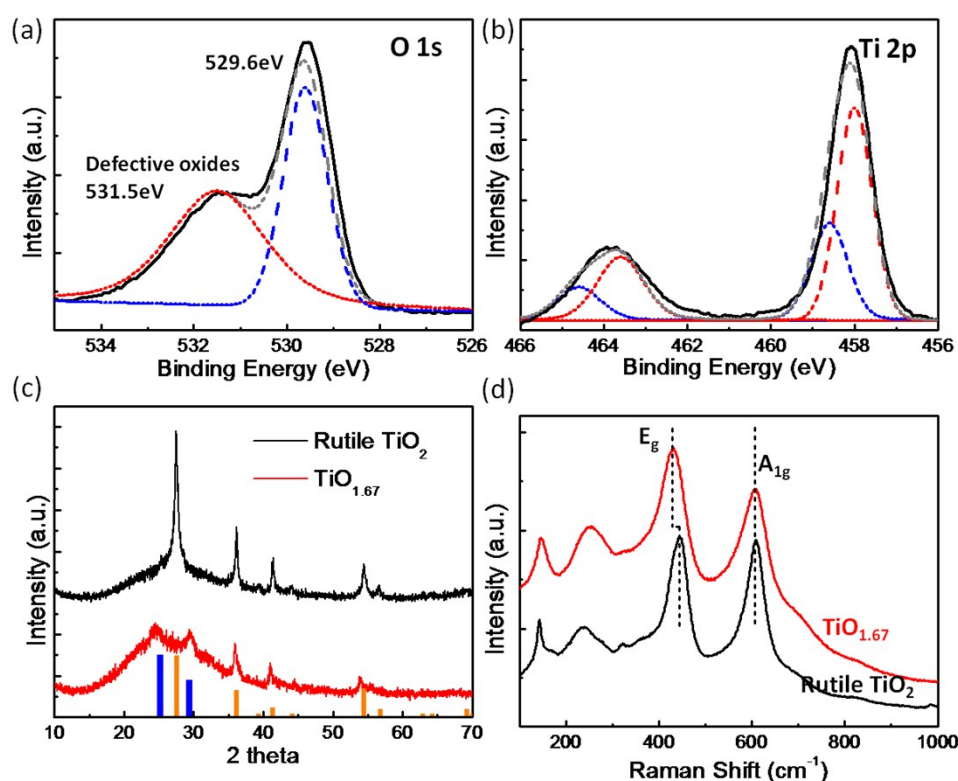

**Figure S1.** (a) O 1s XPS spectra of the titanium oxide. The black curve is the experimental result resolved into two peaks at 529.6 eV (blue dashed curve) and 531.5 eV (red dashed curve) with the area ratio 2:3. The grey dashed curve is the summation of the two decomposed peaks. (b) Ti 2p XPS spectra of the as-synthesized  $\text{TiO}_{1.67}$  NPs. Black curve is the experimental result. And the grey dashed curve is the summation of four decomposed peaks at 458.6 eV ( $\text{Ti}^{4+} 2p_{3/2}$ ), 464.6 eV ( $\text{Ti}^{4+} 2p_{1/2}$ ), 458.0 ( $\text{Ti}^{3+} 2p_{3/2}$ ) and 463.5 eV ( $\text{Ti}^{3+} 2p_{1/2}$ ). (c) XRD patterns of pristine  $\text{TiO}_{1.67}$  NPs and the rutile  $\text{TiO}_2$  obtained after annealing treatment at 500°C. Blue bars represent the diffraction peaks of  $\text{Ti}_3\text{O}_5$  (JCPDS #11-0217), and orange bars are typical peaks of rutile  $\text{TiO}_2$  (JCPDS #65-0192). (d) Raman spectra of  $\text{TiO}_{1.67}$  (red curve) and rutile  $\text{TiO}_2$  (black curve).

**Supplementary note 2.** The absorption spectrum of  $\text{TiO}_{1.67}$  NPs was measured by a UV-Vis-NIR spectrophotometer (Lambda, PerkinElmer Company). The typical Tauc plot derived from the UV-vis absorption spectrum was used to determine the bandgap.

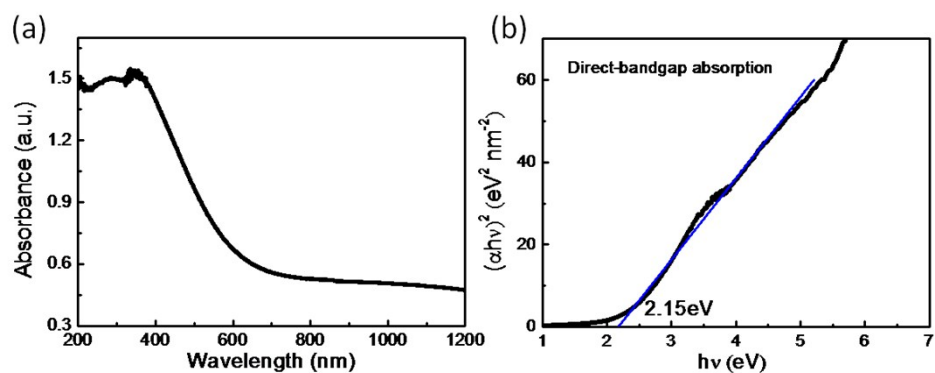

**Figure S2.** (a) Absorbance of  $\text{TiO}_{1.67}$  NPs colloidal suspension. (b) The typical Tauc plot derived from the UV-vis absorption spectrum.

**Supplementary note 3.**

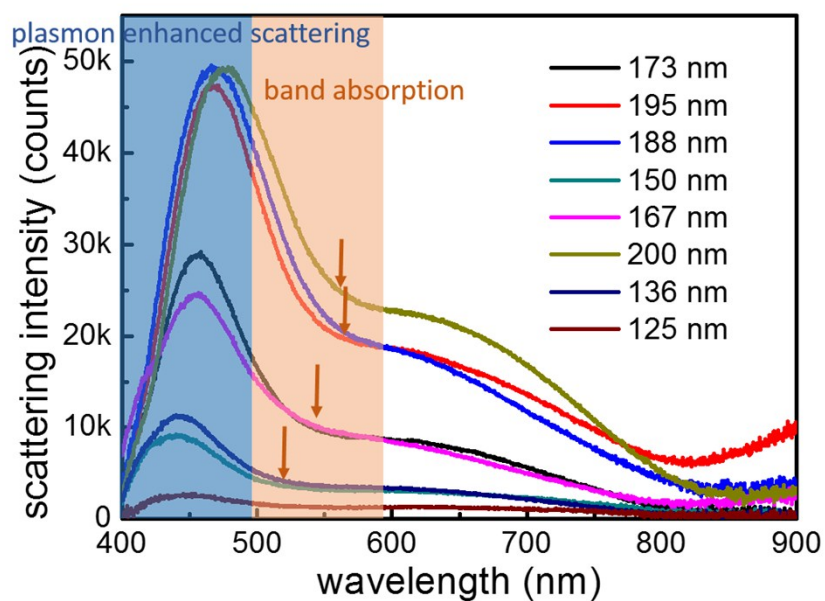

**Figure S3.** Scattering spectra of TiO<sub>1.67</sub> nanoparticles with varied diameters. Arrows show the scattering dips. Orange and blue regions mean the “band absorption” region and the “plasmon enhanced scattering” region.

**Supplementary note 4.** In dark-field scattering measurement process, the light source spectrum was measured through the reflected light from a mirror.

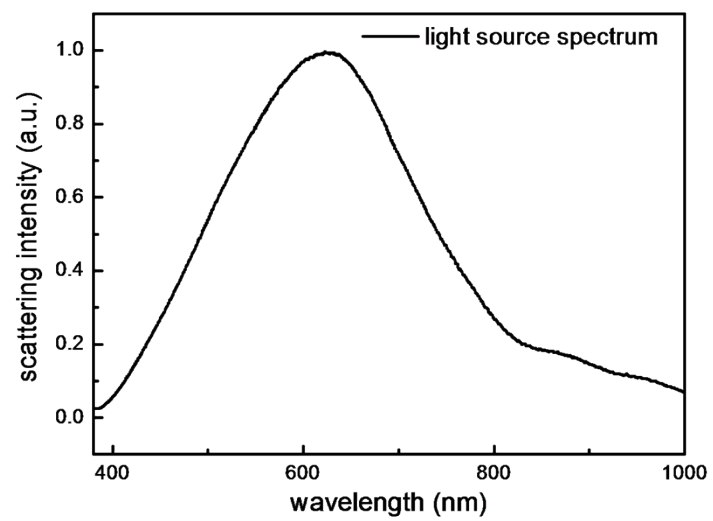

**Figure S4.** Light source spectrum measured through the reflected light from a mirror.
